# Supplementary material for: Blood Pressure Control in Hypertensive Patients in Federally Qualified Health Centers: Impact of Shared Decision Making in the Office-GAP Program
Source: PubMed Central journal article supplement — MDM Policy Pract. 2016 Jul 7;1(1):2381468316656010. doi: 10.1177/2381468316656010 (PMC6125053; doi:10.1177/2381468316656010), 2016-07-07
Supplement: DS_10.1177_2381468316656010.pdf [file DS_10.1177_2381468316656010.pdf]

**Table S1: Characteristics for the Intervention and the Control centers**

|                              | Intervention (n=120) |          | Control (n=123) |          | P-value       |
|------------------------------|----------------------|----------|-----------------|----------|---------------|
|                              | Mean                 | SD       | Mean            | SD       |               |
| Age (years)                  | 56.15                | 10.17    | 53.84           | 11.59    | 0.10          |
| BMI                          | 32.60                | 8.57     | 32.18           | 8.49     | 0.71          |
|                              | <b>n</b>             | <b>%</b> | <b>n</b>        | <b>%</b> |               |
| Gender                       | 120                  |          | 123             |          | 0.87          |
| Females                      | 68                   | 56.7     | 71              | 57.7     |               |
| Race                         | 117                  |          | 121             |          | <.0001        |
| White                        | 40                   | 34.2     | 51              | 42.2     |               |
| Black                        | 60                   | 51.3     | 31              | 25.6     |               |
| Asian                        | 3                    | 2.6      | 28              | 23.1     |               |
| Hispanic                     | 12                   | 10.3     | 8               | 6.6      |               |
| Others                       | 2                    | 1.7      | 3               | 2.5      |               |
| Smokers                      | 119                  |          | 123             |          | 0.16          |
| Smokers                      | 47                   | 39.5     | 38              | 30.9     |               |
| Non smokers                  | 72                   | 60.5     | 85              | 69.1     |               |
| Immigrant                    | 111                  |          | 120             |          | <.0001        |
| Non-immigrant                | 102                  | 91.9     | 70              | 58.3     |               |
| Immigrant                    | 9                    | 8.1      | 50              | 41.7     |               |
| Insurance(multiple-choice)   | 117                  |          | 121             |          |               |
| Medicaid                     | 40                   | 34.2     | 58              | 47.9     | <b>0.031</b>  |
| Medicare                     | 36                   | 30.8     | 24              | 19.8     | 0.052         |
| Ingham Health Plan           | 50                   | 42.7     | 45              | 37.2     | 0.38          |
| Others                       | 10                   | 8.6      | 25              | 20.7     | <b>0.0078</b> |
| Medical History              | 120                  |          | 123             |          |               |
| Hypertension                 | 95                   | 79.2     | 87              | 70.7     | 0.13          |
| High Cholesterol             | 74                   | 61.7     | 66              | 53.7     | 0.21          |
| Depression                   | 58                   | 48.3     | 37              | 30.1     | <b>0.0036</b> |
| Asthma                       | 15                   | 12.5     | 12              | 9.8      | 0.51          |
| Stroke                       | 8                    | 6.7      | 9               | 7.3      | 0.84          |
| Congestive Heart Failure     | 8                    | 6.7      | 7               | 5.7      | 0.75          |
| Cancer                       | 14                   | 11.7     | 10              | 8.1      | 0.36          |
| PVD                          | 7                    | 5.8      | 10              | 8.1      | 0.48          |
| CAD                          | 24                   | 20.0     | 15              | 12.2     | 0.10          |
| Charlson Index               | 120                  |          | 122             |          | 0.11          |
| Mildly ill(1<=CCI<=2)        | 25                   | 20.8     | 39              | 32.0     |               |
| Moderately ill (3<=CCI<=4)   | 64                   | 53.3     | 60              | 49.2     |               |
| Severely ill(5<=CCI)         | 31                   | 25.8     | 23              | 18.9     |               |
| Diabetes                     | 119                  |          | 122             |          | 0.17          |
| With Diabetes                | 109                  | 91.6     | 105             | 86.1     |               |
| Blood Pressure – at baseline | 92                   |          | 84              |          | 0.46          |
| Controlled                   | 27                   | 29.4     | 29              | 34.5     |               |
| Blood Pressure – at 3 months | 84                   |          | 75              |          | 0.36          |

|                               |     |     |      |     |     |      |      |
|-------------------------------|-----|-----|------|-----|-----|------|------|
| Controlled                    |     | 28  | 33.3 |     | 20  | 26.7 |      |
| Blood Pressure – at 6 months  | 77  |     |      | 69  |     |      | 0.38 |
| Controlled                    |     | 24  | 31.2 |     | 17  | 24.6 |      |
| Blood Pressure – at 12 months | 70  |     |      | 40  |     |      | 0.49 |
| Controlled                    |     | 20  | 28.6 |     | 9   | 22.5 |      |
| Medication Use (eligible)     | 119 |     |      | 122 |     |      |      |
| Aspirin/Plavix                |     | 84  | 70.6 |     | 80  | 65.6 | 0.40 |
| Beta-blockers                 |     | 45  | 37.8 |     | 44  | 36.1 | 0.78 |
| ACEI/ARB                      |     | 114 | 95.8 |     | 111 | 91.0 | 0.13 |
| statins                       |     | 84  | 70.6 |     | 78  | 63.9 | 0.27 |

BMI, body mass index; PVD; peripheral vascular disease; CAD, coronary artery disease; CCI, charlson comorbidity index; ACEI/ARB, angiotensin-converting enzyme inhibitors/ angiotensin receptor blockers
